# Supplementary material for: Comparison of Functional and Structural Neural Network Features in Older Adults With Depression With vs Without Apathy and Association With Response to Escitalopram: Secondary Analysis of a Nonrandomized Clinical Trial
Source: PubMed Central journal article supplement (PMC9331093; doi:10.1001/jamanetworkopen.2022.24142), 2022-07-27
Supplement: jamanetwopen-e2224142-s002.pdf [file jamanetwopen-e2224142-s002.pdf]

## Data Sharing Statement

Oberlin. Comparison of Functional and Structural Neural Network Features in Older Adults With Depression With vs Without Apathy and Association With Response to Escitalopram. *JAMA Netw Open*. Published July 27, 2022. doi:10.1001/jamanetworkopen.2022.24142

### Data

**Data available:** Yes

**Data types:** Deidentified participant data, Data dictionary

**How to access data:** Request for data to corresponding author, Dr. Faith Gunning ([fgd2002@med.cornell.edu](mailto:fgd2002@med.cornell.edu)).

**When available:** With publication

### Supporting Documents

**Document types:** None

### Additional Information

**Who can access the data:** Researchers requesting data whose proposed use of data has been approved.

**Types of analyses:** For a specified purpose.

**Mechanisms of data availability:** With investigator support, after approval of a proposal.
